# Supplementary material for: Evaluating Targeted Therapies in Ovarian Cancer Metabolism: Novel Role for PCSK9 and Second Generation mTOR Inhibitors
Source: Cancers (Basel). 2021 Jul 24;13(15):3727. doi: 10.3390/cancers13153727 (PMC8345177; doi:10.3390/cancers13153727)
Supplement: Supplementary file 1 [file cancers-13-03727-s001.zip › cancers-1228664-supplementary.pdf]

# Supplementary Materials: Evaluating Targeted Therapies in Ovarian Cancer Metabolism: Novel Role for PCSK9 and Second Generation mTOR Inhibitors

Dafne Jacome Sanz, Juuli Raivola, Hanna Karvonen, Mariliina Arjama, Harlan Barker, Astrid Murumägi and Daniela Ungureanu

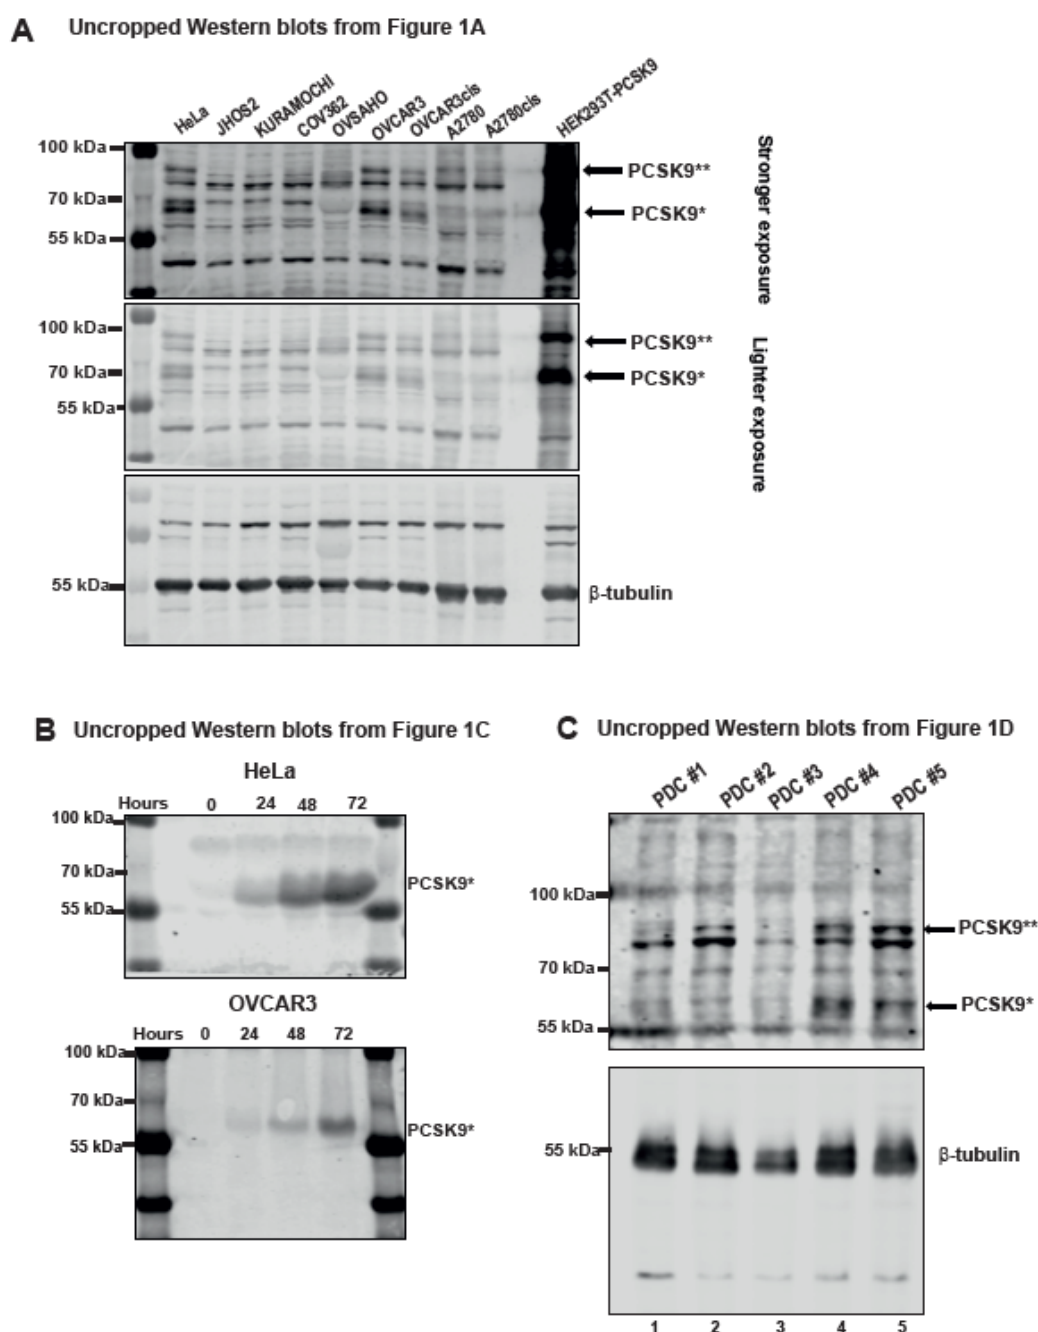

**Figure S1.** Analysis of PCSK9 isoforms in OC models. (A) Upper panel: Uncropped Western blot of Figure 1A showing PCSK9 expression in the OC cell lines. For an accurate analysis, a sample of over-expressed PCSK9 in HEK293T cells is shown as HEK293T-PCSK9. Lower panel:  $\beta$ -tubulin levels as loading control. (B) Uncropped Western blots from Figure 1C. (C) Uncropped Western blots from Figure 1D.

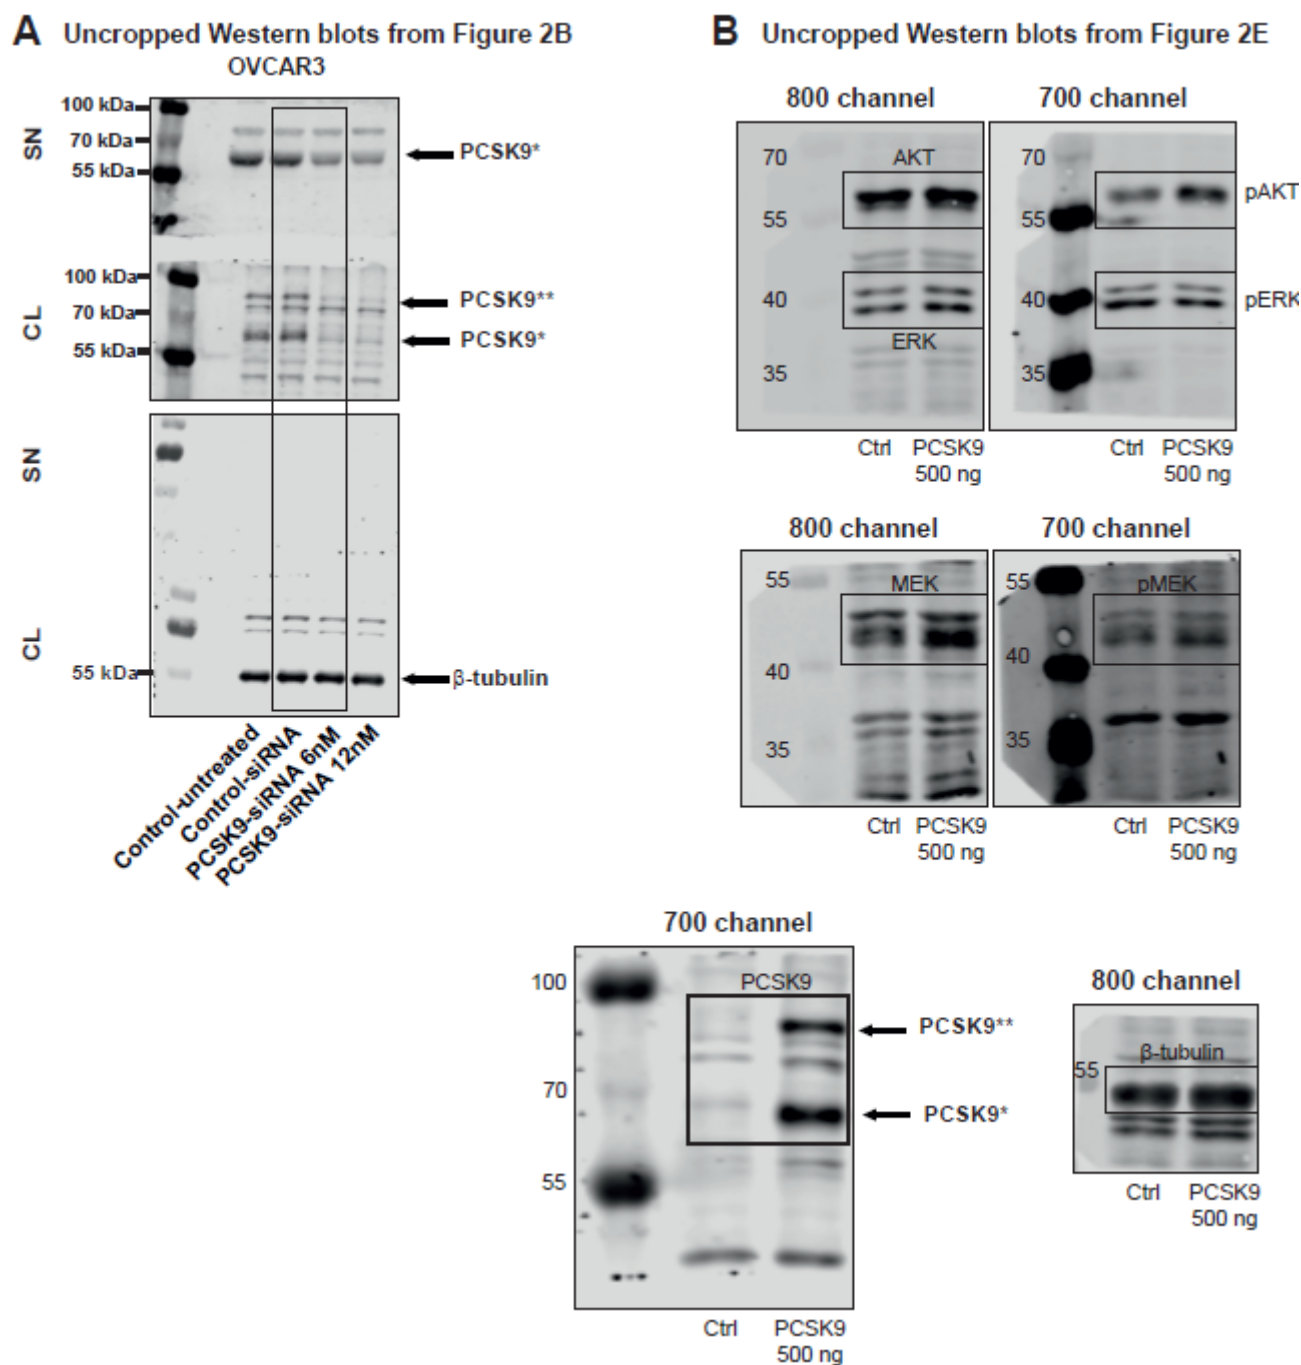

**Figure S2.** Analysis of PCSK9 targeting in OC cell line. (A) Upper panel: Uncropped Western blot of Figure 2B showing PCSK9 expression in OVCAR3 cells treated with Control-siRNA or PCSK9-siRNA for 48h, for supernatant (SN) and cell lysate fractions (CL). Lower panel: β-tubulin levels as loading control. (B) Uncropped Western blots for Figure 2E showing the expression of indicated protein from JHOS2 ctrl or PCSK9 (500 ng) transfection. Frames in blots indicate the bands shown in Figure 2E. Ladder molecular weights in kDas.

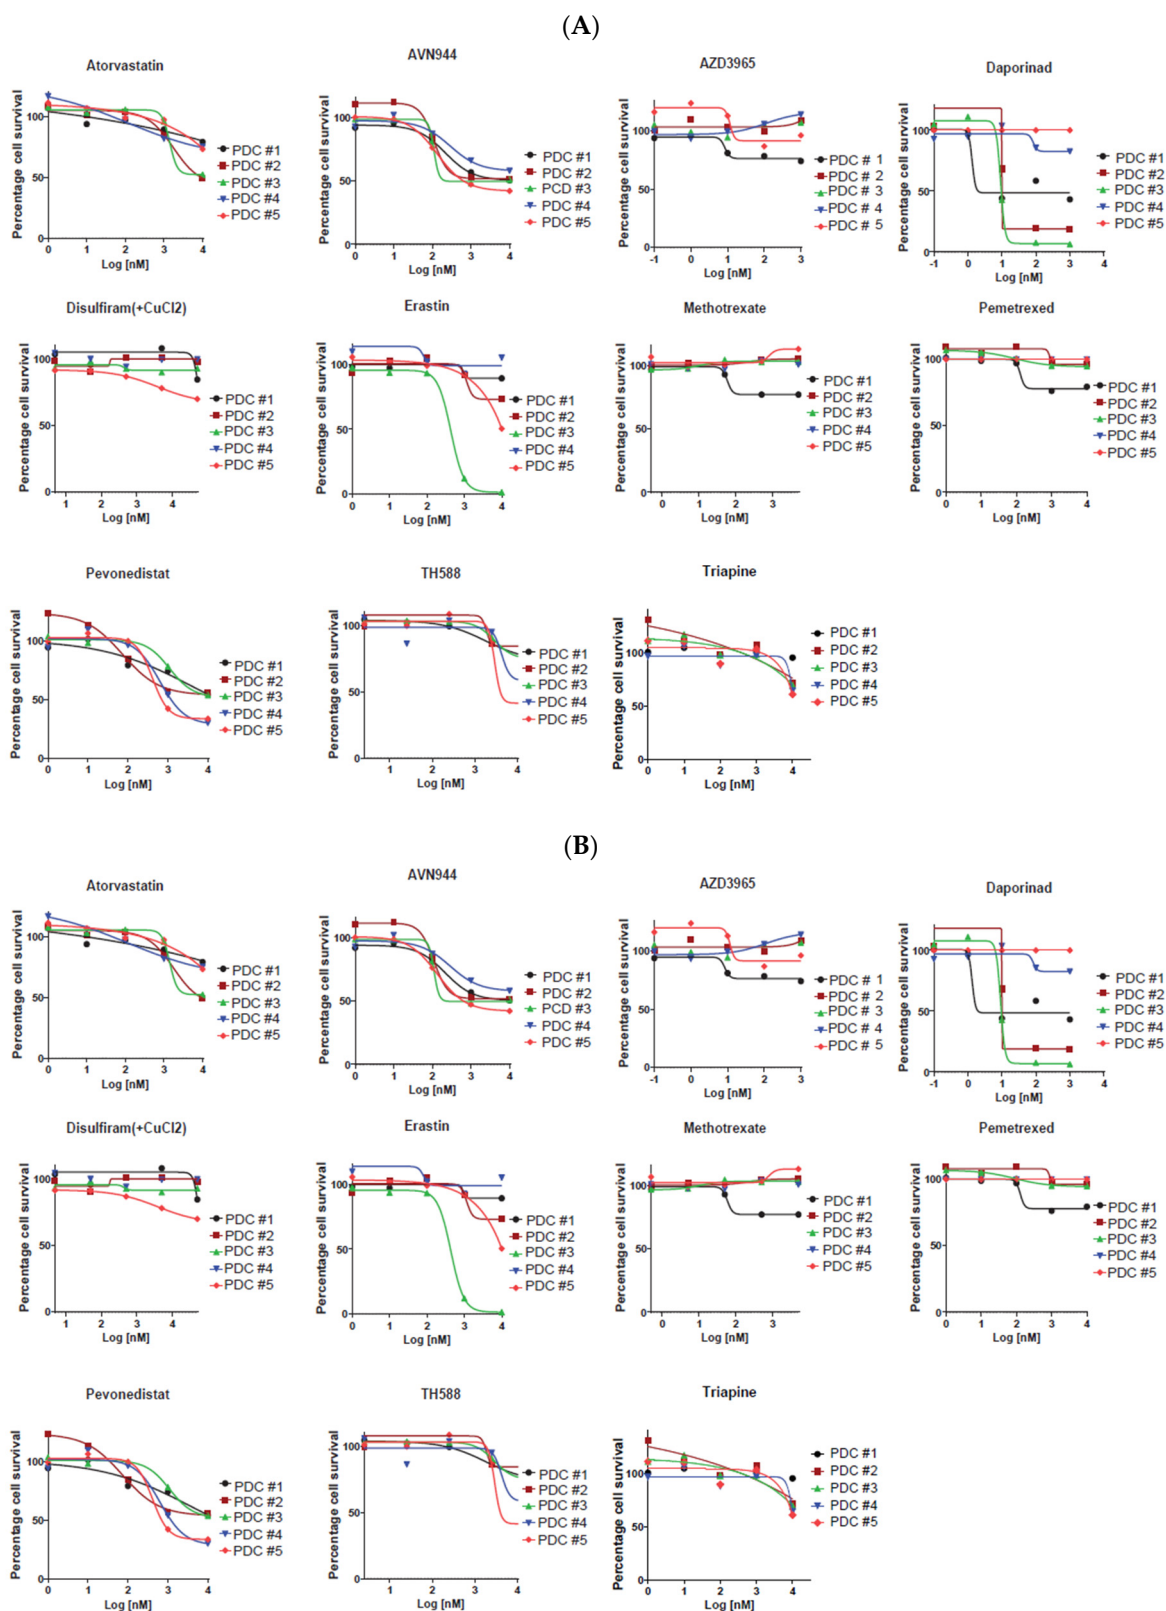

**Figure S3.** Original drug-response curves of anti-metabolic drugs ( $n = 11$ ) in OC cell lines (A) and PDCs (B). For each drug, five concentrations are represented as log<sub>10</sub> values, and cell viability is calculated as percentage inhibition, where the lowest drug concentration is given 100% percentage cell survival.

(A)

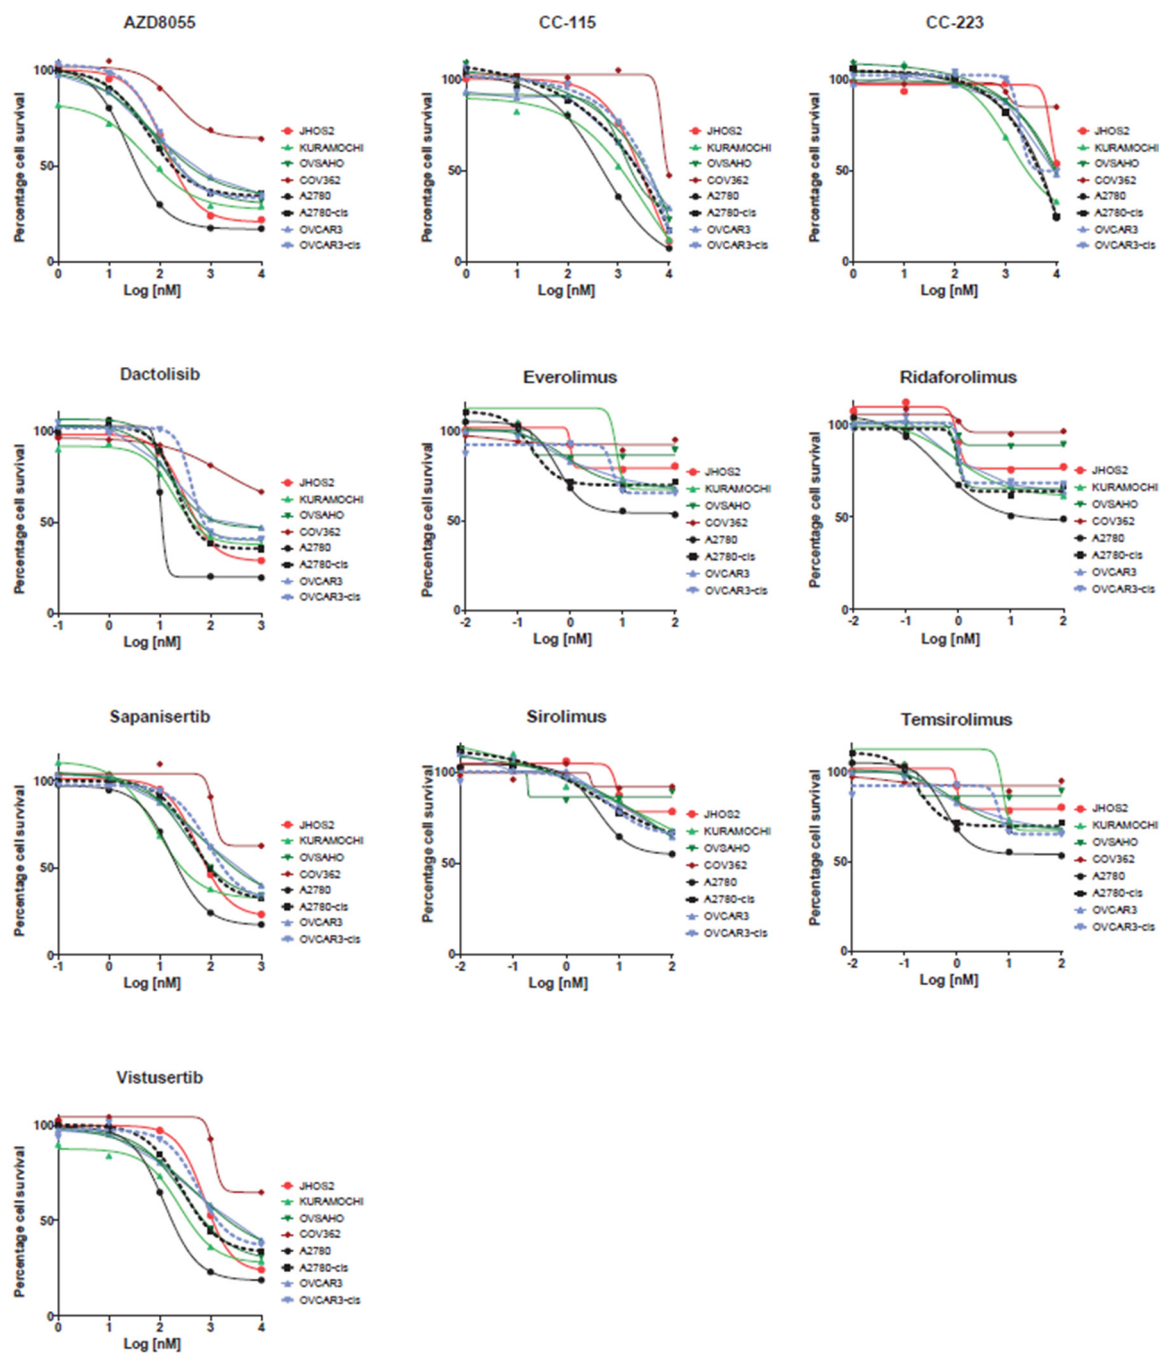

(B)

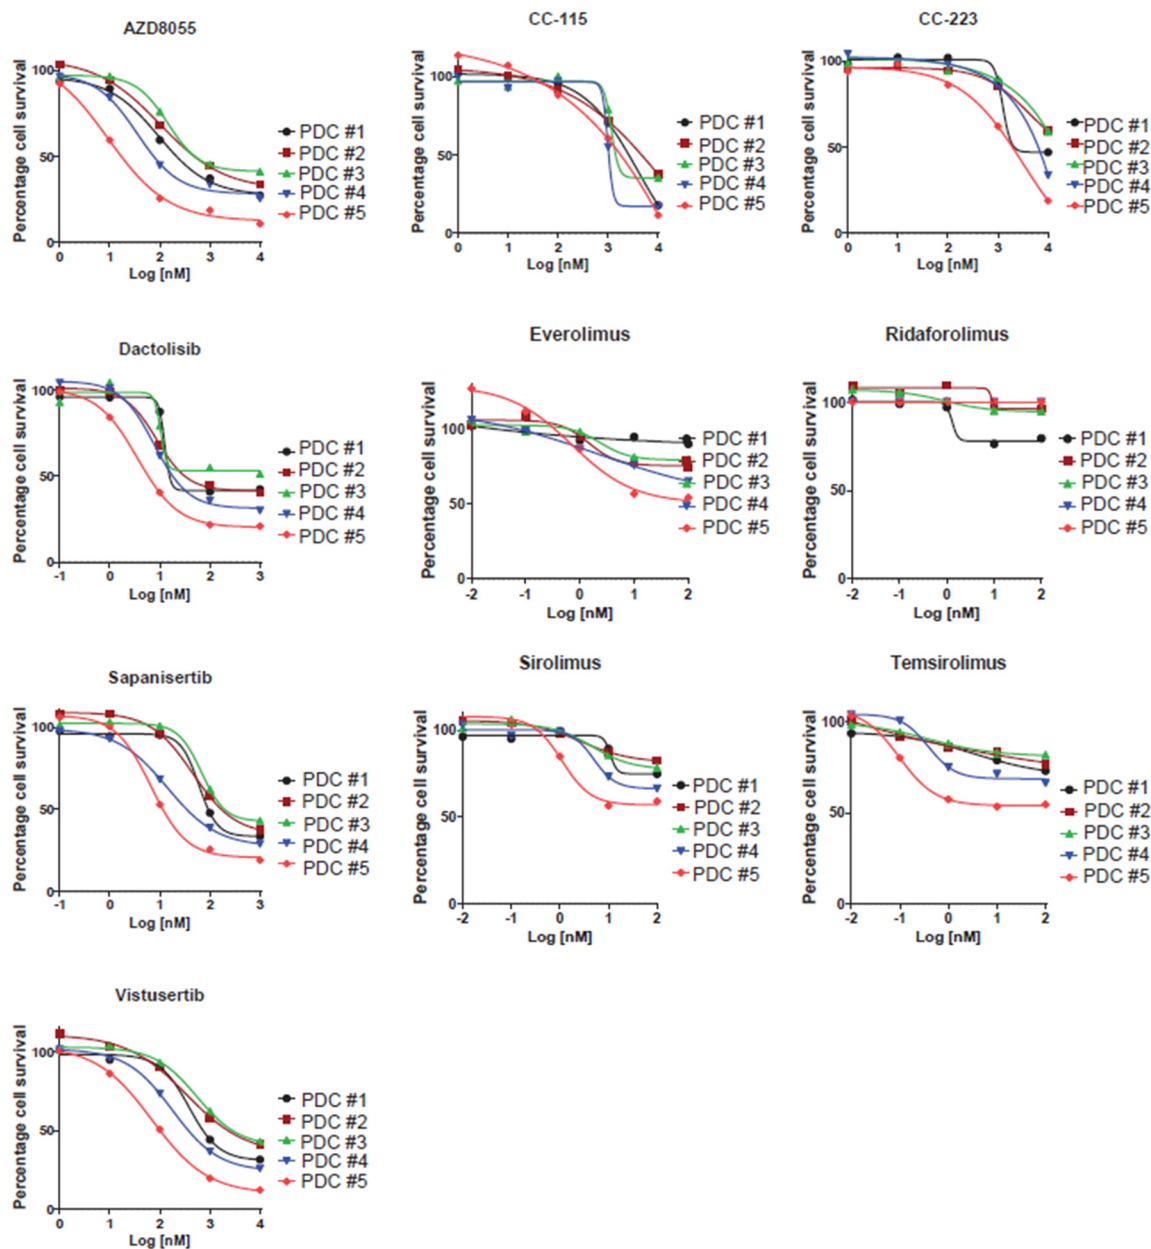

**Figure S4.** Original drug-response curves of mTOR targeting drugs ( $n = 10$ ) in OC cell lines (A) and PDCs (B). For each drug, five concentrations are represented as log M values, and cell viability is calculated as percentage inhibition, where the lowest drug concentration is given 100% percentage cell survival.

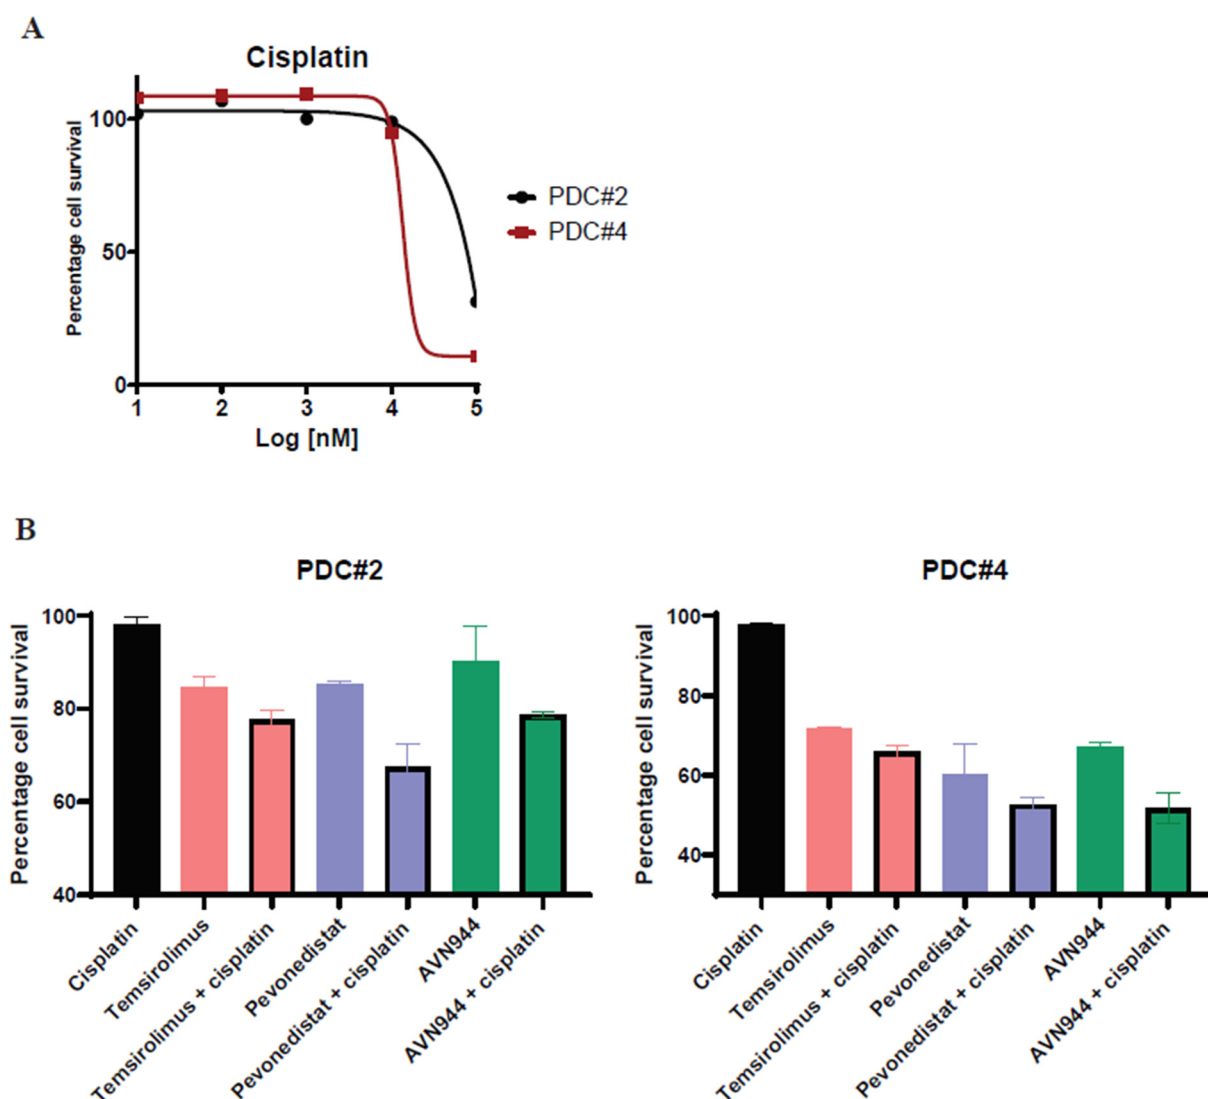

**Figure S5.** The effect of cisplatin (A) and cisplatin in combination with other drugs (B) on PDC#2 and PDC#4. (A) Drug response curves for cisplatin sensitivity in PDC#2 and PDC#4. Five concentrations of cisplatin are represented as log M values and cell viability is calculated as percentage inhibition, where the lowest cisplatin concentration is given 100% percentage cell survival. (B) Drug combination using cisplatin together with either temsirolimus, pevonedistat and AVN944 showed enhanced cytotoxic activity in both, PDC#2 and PDC#4 when both drugs were added, compared to either treatment alone. For drug combinations, a concentration of 1  $\mu$ M cisplatin was chosen, as it had no effect on cell survival in (A). Other drugs were used at concentration of 1 nM (temsirolimus) and 100 nM (pevonedistat and AVN944). PDCs were treated with drugs or drug-combinations as indicated for 72 h and cell viability was calculated as percentage inhibition compared to vehicle (DMSO) control (100%). Each experiment was performed in duplicates and error bars indicate standard deviations.

**Table S1.** Signal values for of the Western blots in Figure 1.

| Figure 1A |         |           |        |        |        |
|-----------|---------|-----------|--------|--------|--------|
| PCSK9**   | Channel | Name      | Signal | Signal | Signal |
|           | 700     | HeLa      | 174    | 111    | 1540   |
|           | 700     | JHOS2     | 32,9   | 0,291  | 219    |
|           | 700     | Kuramochi | 38,2   | 23,9   | 440    |
|           | 700     | COV362    | 57,6   | 35,9   | 729    |
|           | 700     | OVSCHO    | 66     | 6,13   | 152    |
|           | 700     | OVCAR3    | 213    | 216    | 1660   |
|           | 700     | OVCAR3cis | 336    | 208    | 623    |
|           | 700     | A2780     | 41,3   | 35     | 716    |
|           | 700     | A2780cis  | 44,9   | 28,5   | 548    |
| PCSK9*    | Channel | Name      | Signal | Signal | Signal |
|           | 700     | HeLa      | 416    | 271    | 2720   |
|           | 700     | JHOS2     | 57,6   | 28,5   | 642    |
|           | 700     | Kuramochi | 13,6   | 29     | 874    |
|           | 700     | COV362    | 203    | 84,7   | 1330   |
|           | 700     | OVSCHO    | 59,8   | 19     | 182    |
|           | 700     | OVCAR3    | 444    | 463    | 1280   |
|           | 700     | OVCAR3cis | 951    | 652    | 716    |
|           | 700     | A2780     | 5,95   | 51,9   | 261    |
|           | 700     | A2780cis  | 11,1   | 67,9   | 428    |
| Tubulin   | Channel | Name      | Signal | Signal | Signal |
|           | 800     | HeLa      | 711    | 1390   | 5280   |
|           | 800     | JHOS2     | 583    | 1000   | 4200   |
|           | 800     | Kuramochi | 616    | 1560   | 4280   |
|           | 800     | COV362    | 1190   | 2360   | 5220   |
|           | 800     | OVSCHO    | 372    | 749    | 3340   |
|           | 800     | OVCAR3    | 698    | 1550   | 3030   |
|           | 800     | OVCAR3cis | 803    | 1610   | 3250   |
|           | 800     | A2780     | 647    | 1570   | 4610   |
|           | 800     | A2780cis  | 686    | 1010   | 4110   |

| Figure 1C |         |      |        |  |
|-----------|---------|------|--------|--|
| PCSK9**   | OVCAR3  |      |        |  |
|           | Channel | Name | Signal |  |
|           | 700     | 0    | 4510   |  |
|           | 700     | 24   | 13200  |  |
|           | 700     | 48   | 47400  |  |
| PCSK9*    | HeLA    |      |        |  |
|           | Channel | Name | Signal |  |
|           | 700     | 0    | 158    |  |
|           | 700     | 24   | 2510   |  |
|           | 700     | 48   | 13700  |  |
|           | 700     | 72   | 26300  |  |

| Figure 1E |         |        |        |        |        |
|-----------|---------|--------|--------|--------|--------|
| PCSK9**   | Channel | Name   | Signal | Signal | Signal |
|           | 700     | PDC #1 | 16,9   | 19,9   | 29,1   |
|           | 700     | PDC #2 | 20,6   | 41,9   | 49,9   |
|           | 700     | PDC #3 | 12     | 9,87   | 9,1    |
|           | 700     | PDC #4 | 32     | 66,6   | 65,3   |
| PCSK9*    | 700     | PDC #5 | 52,7   | 76,9   | 77     |
|           | Channel | Name   | Signal | Signal | Signal |
|           | 700     | PDC #1 | 32,3   | 43,9   | 36,2   |
|           | 700     | PDC #2 | 30,3   | 26,9   | 26,6   |
|           | 700     | PDC #3 | 16,1   | 26     | 17,3   |
| Tubulin   | 700     | PDC #4 | 80,2   | 120    | 94,3   |
|           | 700     | PDC #5 | 149    | 108    | 100    |
|           | Channel | Name   | Signal | Signal | Signal |
|           | 800     | PDC #1 | 11300  | 11300  | 11300  |
|           | 800     | PDC #2 | 11600  | 11600  | 11600  |
|           | 800     | PDC #3 | 8170   | 8170   | 8170   |
|           | 800     | PDC #4 | 11700  | 11700  | 11700  |
|           | 800     | PDC #5 | 11900  | 11900  | 11900  |

**Table S2.** Signal values from the western blots in Figure 2.

| Signals for quantifications in 2C |                            |                    |      |      |                      |      |      |
|-----------------------------------|----------------------------|--------------------|------|------|----------------------|------|------|
| Channel                           | Antibody/band              | OVCAR3 – Ctr-siRNA |      |      | OVCAR3 – PCSK9-siRNA |      |      |
| 700                               | PCSK9* SN                  | 1990               | 1910 | 4160 | 670                  | 466  | 1390 |
| 700                               | PCSK9** CL                 | 433                | 114  | 1390 | 75.7                 | 14.8 | 605  |
| 700                               | PCSK9* CL                  | 928                | 525  | 3170 | 144                  | 72   | 947  |
| 800                               | $\beta$ -tubulin           | 14500              | 1020 | 5340 | 12800                | 951  | 6120 |
| Signals for quantifications in 2F |                            |                    |      |      |                      |      |      |
| Channel                           | Antibody                   | JHOS2 - Ctrl       |      |      | JHOS2 - PCSK9        |      |      |
| 800                               | AKT                        | 2630               | 3380 | 2530 | 2910                 | 3550 | 2870 |
| 700                               | pAKT (Ser 473)             | 611                | 734  | 548  | 958                  | 1030 | 855  |
| 800                               | MEK1/2                     | 813                | 741  | 1320 | 1020                 | 642  | 1650 |
| 700                               | pMEK1/2 (Ser217/221)       | 256                | 415  | 407  | 304                  | 344  | 532  |
| 800                               | ERK1/2                     | 1430               | 2230 | 1070 | 1920                 | 2620 | 1470 |
| 700                               | pERK1/2<br>(Thr202/Tyr204) | 1000               | 3270 | 1730 | 811                  | 4010 | 2220 |
| 800                               | $\beta$ -tubulin           | 671                | 4570 | 1620 | 713                  | 3890 | 1700 |
